# Supplementary material for: Supramolecular aggregation of yttrium thiocyanate with 4,4′-bipyridine
Source: Royal Society of Chemistry journal article supplement (doi:10.1039/c4nj00598h), 2014-01-01
Supplement: c4nj00598h1.pdf [file c4nj00598h1.pdf]

# Supporting information

## SUPRAMOLECULAR AGGREGATION OF YTTRIUM THIOCYANATE WITH 4,4'- BIPYRIDINE

Svetlana Petrosyants, Zhanna Dobrokhotova, Andrey Ilyukhin\*, Vladimir Novotortsev

*N.S. Kurnakov Institute of General and Inorganic Chemistry, Russian Academy of Sciences,  
Leninsky Prosp. 31, 119991 Moscow, GSP-1, Russian Federation. E-mail:ilyukhin@rambler.ru*

Table S1. . Thermodynamic functions of  $[\text{Y}(\text{H}_2\text{O})_3\text{EtOH}(\text{bpy})(\text{NCS})_3]\cdot\text{bpy}$  (**1**) and  $[\text{Y}(\text{H}_2\text{O})_5(\text{NCS})_3]\cdot\text{H}_2\text{O}$

| T, K   | $[\text{Y}(\text{H}_2\text{O})_3\text{EtOH}(\text{bpy})(\text{NCS})_3]\cdot\text{bpy}$ |                 |                    |                        | $[\text{Y}(\text{H}_2\text{O})_5(\text{NCS})_3]\cdot\text{H}_2\text{O}$ |                 |                    |                        |
|--------|----------------------------------------------------------------------------------------|-----------------|--------------------|------------------------|-------------------------------------------------------------------------|-----------------|--------------------|------------------------|
|        | $C_p^0(\text{T})$                                                                      | $S^0(\text{T})$ | $\Phi^0(\text{T})$ | $H^0(\text{T})-H^0(0)$ | $C_p^0(\text{T})$                                                       | $S^0(\text{T})$ | $\Phi^0(\text{T})$ | $H^0(\text{T})-H^0(0)$ |
|        | J/(K mol)                                                                              |                 |                    | J/mol                  | J/(K mol)                                                               |                 |                    | J/mol                  |
| 10     | 12.80                                                                                  | 4.095           | 0.9315             | 31.63                  | 8.665                                                                   | 3.286           | 0.8405             | 24.45                  |
| 15     | 30.79                                                                                  | 12.53           | 3.286              | 138.7                  | 17.58                                                                   | 8.419           | 2.470              | 89.24                  |
| 20     | 52.55                                                                                  | 24.30           | 7.008              | 345.8                  | 29.69                                                                   | 15.06           | 4.754              | 206.1                  |
| 25     | 76.63                                                                                  | 38.58           | 11.86              | 668.1                  | 43.02                                                                   | 23.13           | 7.602              | 388.1                  |
| 30     | 101.6                                                                                  | 54.75           | 17.64              | 1113                   | 55.67                                                                   | 32.10           | 10.93              | 635.1                  |
| 35     | 125.9                                                                                  | 72.25           | 24.18              | 1683                   | 67.98                                                                   | 41.60           | 14.63              | 944.2                  |
| 40     | 148.5                                                                                  | 90.56           | 31.33              | 2369                   | 80.37                                                                   | 51.49           | 18.61              | 1315                   |
| 45     | 169.3                                                                                  | 109.3           | 38.94              | 3164                   | 92.89                                                                   | 61.68           | 22.83              | 1748                   |
| 50     | 188.7                                                                                  | 128.1           | 46.92              | 4060                   | 105.3                                                                   | 72.11           | 27.23              | 2244                   |
| 60     | 225.0                                                                                  | 165.8           | 63.59              | 6131                   | 128.8                                                                   | 93.42           | 36.48              | 3416                   |
| 70     | 260.0                                                                                  | 203.1           | 80.86              | 8556                   | 148.9                                                                   | 114.8           | 46.15              | 4808                   |
| 80     | 292.8                                                                                  | 240.0           | 98.45              | 11320                  | 167.7                                                                   | 135.9           | 56.06              | 6391                   |
| 90     | 320.2                                                                                  | 276.1           | 116.2              | 14390                  | 181.6                                                                   | 156.5           | 66.08              | 8140                   |
| 100    | 343.6                                                                                  | 311.1           | 133.9              | 17710                  | 196.0                                                                   | 176.4           | 76.13              | 10030                  |
| 110    | 365.8                                                                                  | 344.9           | 151.6              | 21260                  | 211.6                                                                   | 195.8           | 86.13              | 12060                  |
| 120    | 387.4                                                                                  | 377.6           | 169.1              | 25030                  | 227.7                                                                   | 214.9           | 96.06              | 14260                  |
| 130    | 408.8                                                                                  | 409.5           | 186.3              | 29010                  | 243.8                                                                   | 233.8           | 105.9              | 16620                  |
| 140    | 430.5                                                                                  | 440.6           | 203.4              | 33210                  | 259.6                                                                   | 252.4           | 115.7              | 19140                  |
| 150    | 452.5                                                                                  | 471.0           | 220.2              | 37620                  | 274.8                                                                   | 270.9           | 125.5              | 21810                  |
| 160    | 474.4                                                                                  | 500.9           | 236.8              | 42250                  | 289.3                                                                   | 289.1           | 135.1              | 24630                  |
| 170    | 495.7                                                                                  | 530.3           | 253.2              | 47110                  | 303.2                                                                   | 307.0           | 144.7              | 27590                  |
| 180    | 515.9                                                                                  | 559.2           | 269.4              | 52160                  | 316.6                                                                   | 324.7           | 154.2              | 30690                  |
| 190    | 535.0                                                                                  | 587.7           | 285.4              | 57420                  | 329.5                                                                   | 342.2           | 163.6              | 33920                  |
| 200    | 553.9                                                                                  | 615.6           | 301.3              | 62860                  | 342.0                                                                   | 359.4           | 173.0              | 37280                  |
| 210    | 573.5                                                                                  | 643.1           | 316.9              | 68500                  | 354.2                                                                   | 376.4           | 182.3              | 40760                  |
| 220    | 594.6                                                                                  | 670.2           | 332.3              | 74340                  | 366.1                                                                   | 393.2           | 191.5              | 44370                  |
| 230    | 618.9                                                                                  | 697.2           | 347.6              | 80400                  | 377.7                                                                   | 409.7           | 200.6              | 48080                  |
| 240    | 652.0                                                                                  | 724.2           | 362.7              | 86740                  | 388.8                                                                   | 426.0           | 209.7              | 51920                  |
| 250    | 656.8                                                                                  | 750.8           | 377.7              | 93260                  | 399.5                                                                   | 442.1           | 218.6              | 55860                  |
| 260    | 677.2                                                                                  | 776.9           | 392.6              | 99930                  | 409.7                                                                   | 458.0           | 227.5              | 59900                  |
| 270    | 697.0                                                                                  | 802.9           | 407.3              | 106800                 | 419.5                                                                   | 473.6           | 236.4              | 64050                  |
| 280    | 716.7                                                                                  | 828.6           | 421.9              | 113900                 | 429.3                                                                   | 489.0           | 245.1              | 68300                  |
| 290    | 736.1                                                                                  | 854.0           | 436.3              | 121100                 | 439.3                                                                   | 504.3           | 253.8              | 72640                  |
| 298.15 | 751.9                                                                                  | 874.7           | 448.0              | 127200                 | 447.7                                                                   | 516.6           | 260.8              | 76250                  |

Table S2. Crystal data and structure refinement statistics for **1–7**.

|                                   |                                                                                              |
|-----------------------------------|----------------------------------------------------------------------------------------------|
| Identification code               | <b>1</b>                                                                                     |
| Empirical formula                 | C <sub>25</sub> H <sub>28</sub> N <sub>7</sub> O <sub>4</sub> S <sub>3</sub> Y               |
| Formula weight                    | 675.63                                                                                       |
| Temperature                       | 150(2) K                                                                                     |
| Wavelength                        | 0.71073 Å                                                                                    |
| Crystal system                    | Orthorhombic                                                                                 |
| Space group                       | P 21 21 21                                                                                   |
| Unit cell dimensions              | a = 13.6795(5) Å<br>b = 14.0922(6) Å<br>c = 15.6687(7) Å                                     |
| Volume                            | 3020.5(2) Å <sup>3</sup>                                                                     |
| Z                                 | 4                                                                                            |
| Density (calculated)              | 1.486 Mg/m <sup>3</sup>                                                                      |
| Absorption coefficient            | 2.181 mm <sup>-1</sup>                                                                       |
| F(000)                            | 1384                                                                                         |
| Crystal size                      | 0.25 x 0.2 x 0.15 mm <sup>3</sup>                                                            |
| Theta range for data collection   | 2.449 to 27.492°.                                                                            |
| Index ranges                      | -9 ≤ h ≤ 17, -18 ≤ k ≤ 6, -20 ≤ l ≤ 20                                                       |
| Reflections collected             | 12585                                                                                        |
| Independent reflections           | 6571 [R(int) = 0.0594]                                                                       |
| Completeness to theta = 25.242°   | 99.1 %                                                                                       |
| Absorption correction             | Semi-empirical from equivalents                                                              |
| Max. and min. transmission        | 0.7457 and 0.6291                                                                            |
| Refinement method                 | Full-matrix least-squares on F <sup>2</sup>                                                  |
| Data / restraints / parameters    | 6571 / 8 / 375                                                                               |
| Goodness-of-fit on F <sup>2</sup> | 0.955                                                                                        |
| Final R indices [I > 2σ(I)]       | R1 = 0.0465, wR2 = 0.0756                                                                    |
| R indices (all data)              | R1 = 0.0937, wR2 = 0.0897                                                                    |
| Absolute structure parameter      | 0.312(9)                                                                                     |
| Largest diff. peak and hole       | 0.603 and -0.366 e.Å <sup>-3</sup>                                                           |
| <hr/>                             |                                                                                              |
| Identification code               | <b>2</b>                                                                                     |
| Empirical formula                 | C <sub>52</sub> H <sub>60</sub> N <sub>14</sub> O <sub>8</sub> S <sub>6</sub> Y <sub>2</sub> |
| Formula weight                    | 1379.32                                                                                      |
| Temperature                       | 150(2) K                                                                                     |
| Wavelength                        | 0.71073 Å                                                                                    |

|                                   |                                                                                                |
|-----------------------------------|------------------------------------------------------------------------------------------------|
| Crystal system                    | Monoclinic                                                                                     |
| Space group                       | P 21/n                                                                                         |
| Unit cell dimensions              | a = 15.0003(12) Å<br>b = 15.3686(9) Å                      β = 112.679(2)°<br>c = 15.1311(8) Å |
| Volume                            | 3218.5(4) Å <sup>3</sup>                                                                       |
| Z                                 | 2                                                                                              |
| Density (calculated)              | 1.423 Mg/m <sup>3</sup>                                                                        |
| Absorption coefficient            | 2.048 mm <sup>-1</sup>                                                                         |
| F(000)                            | 1416                                                                                           |
| Crystal size                      | 0.28 x 0.2 x 0.12 mm <sup>3</sup>                                                              |
| Theta range for data collection   | 2.651 to 29.998°.                                                                              |
| Index ranges                      | -17 ≤ h ≤ 21, 0 ≤ k ≤ 21, -17 ≤ l ≤ 21                                                         |
| Reflections collected             | 9082                                                                                           |
| Independent reflections           | 9082 [R(int) = ?]                                                                              |
| Completeness to theta = 25.242°   | 99.8 %                                                                                         |
| Absorption correction             | Semi-empirical from equivalents                                                                |
| Max. and min. transmission        | 0.746154 and 0.526187                                                                          |
| Refinement method                 | Full-matrix least-squares on F <sup>2</sup>                                                    |
| Data / restraints / parameters    | 9082 / 0 / 370                                                                                 |
| Goodness-of-fit on F <sup>2</sup> | 0.968                                                                                          |
| Final R indices [I > 2σ(I)]       | R1 = 0.0637, wR2 = 0.1332                                                                      |
| R indices (all data)              | R1 = 0.1045, wR2 = 0.1552                                                                      |
| Largest diff. peak and hole       | 1.963 and -1.062 e.Å <sup>-3</sup>                                                             |

|                        |                                                                                            |
|------------------------|--------------------------------------------------------------------------------------------|
| Identification code    | <b>3</b>                                                                                   |
| Empirical formula      | C48 H46 N16 O6 S8 Y2                                                                       |
| Formula weight         | 1377.31                                                                                    |
| Temperature            | 296(2) K                                                                                   |
| Wavelength             | 0.71073 Å                                                                                  |
| Crystal system         | Monoclinic                                                                                 |
| Space group            | P 21/n                                                                                     |
| Unit cell dimensions   | a = 13.995(4) Å<br>b = 15.465(4) Å                      β = 114.419(4)°<br>c = 15.478(4) Å |
| Volume                 | 3050.3(14) Å <sup>3</sup>                                                                  |
| Z                      | 2                                                                                          |
| Density (calculated)   | 1.500 Mg/m <sup>3</sup>                                                                    |
| Absorption coefficient | 2.226 mm <sup>-1</sup>                                                                     |
| F(000)                 | 1400                                                                                       |

|                                   |                                             |
|-----------------------------------|---------------------------------------------|
| Crystal size                      | 0.35 x 0.28 x 0.25 mm <sup>3</sup>          |
| Theta range for data collection   | 2.560 to 25.997°.                           |
| Index ranges                      | -17<=h<=17, -19<=k<=19, -19<=l<=19          |
| Reflections collected             | 34920                                       |
| Independent reflections           | 5981 [R(int) = 0.0479]                      |
| Completeness to theta = 25.242°   | 99.9 %                                      |
| Absorption correction             | Semi-empirical from equivalents             |
| Max. and min. transmission        | 0.6379 and 0.5564                           |
| Refinement method                 | Full-matrix least-squares on F <sup>2</sup> |
| Data / restraints / parameters    | 5981 / 0 / 361                              |
| Goodness-of-fit on F <sup>2</sup> | 1.062                                       |
| Final R indices [I>2sigma(I)]     | R1 = 0.0457, wR2 = 0.1333                   |
| R indices (all data)              | R1 = 0.0784, wR2 = 0.1575                   |
| Largest diff. peak and hole       | 1.060 and -0.537 e.Å <sup>-3</sup>          |

|                                 |                                                                                                 |
|---------------------------------|-------------------------------------------------------------------------------------------------|
| <b>Identification code</b>      | <b>4</b>                                                                                        |
| Empirical formula               | C34 H35 N10 O5 S4 Y                                                                             |
| Formula weight                  | 880.87                                                                                          |
| Temperature                     | 296(2) K                                                                                        |
| Wavelength                      | 0.71073 Å                                                                                       |
| Crystal system                  | Monoclinic                                                                                      |
| Space group                     | P 21/c                                                                                          |
| Unit cell dimensions            | a = 11.8885(6) Å<br>b = 15.5251(9) Å                      β = 102.245(2)°.<br>c = 22.7683(11) Å |
| Volume                          | 4106.7(4) Å <sup>3</sup>                                                                        |
| Z                               | 4                                                                                               |
| Density (calculated)            | 1.425 Mg/m <sup>3</sup>                                                                         |
| Absorption coefficient          | 1.675 mm <sup>-1</sup>                                                                          |
| F(000)                          | 1808                                                                                            |
| Crystal size                    | 0.32 x 0.15 x 0.12 mm <sup>3</sup>                                                              |
| Theta range for data collection | 2.513 to 25.999°.                                                                               |
| Index ranges                    | -14<=h<=14, -19<=k<=18, -27<=l<=28                                                              |
| Reflections collected           | 27236                                                                                           |
| Independent reflections         | 8062 [R(int) = 0.0558]                                                                          |
| Completeness to theta = 25.242° | 99.9 %                                                                                          |
| Absorption correction           | Semi-empirical from equivalents                                                                 |
| Max. and min. transmission      | 0.7453 and 0.5805                                                                               |
| Refinement method               | Full-matrix least-squares on F <sup>2</sup>                                                     |

|                                   |                                    |
|-----------------------------------|------------------------------------|
| Data / restraints / parameters    | 8062 / 0 / 475                     |
| Goodness-of-fit on F <sup>2</sup> | 0.937                              |
| Final R indices [I>2sigma(I)]     | R1 = 0.0447, wR2 = 0.0939          |
| R indices (all data)              | R1 = 0.1064, wR2 = 0.1179          |
| Largest diff. peak and hole       | 0.356 and -0.344 e.Å <sup>-3</sup> |

|                                   |                                                                                 |
|-----------------------------------|---------------------------------------------------------------------------------|
| Identification code               | <b>5</b>                                                                        |
| Empirical formula                 | C46 H37 N14 O S6 Y                                                              |
| Formula weight                    | 1083.16                                                                         |
| Temperature                       | 173(2) K                                                                        |
| Wavelength                        | 0.71073 Å                                                                       |
| Crystal system                    | Monoclinic                                                                      |
| Space group                       | P 21/c                                                                          |
| Unit cell dimensions              | a = 14.7890(9) Å<br>b = 18.1748(12) Å      β = 106.229(2)°<br>c = 19.6738(12) Å |
| Volume                            | 5077.3(6) Å <sup>3</sup>                                                        |
| Z                                 | 4                                                                               |
| Density (calculated)              | 1.417 Mg/m <sup>3</sup>                                                         |
| Absorption coefficient            | 1.446 mm <sup>-1</sup>                                                          |
| F(000)                            | 2216                                                                            |
| Crystal size                      | 0.32 x 0.24 x 0.2 mm <sup>3</sup>                                               |
| Theta range for data collection   | 2.156 to 26.499°.                                                               |
| Index ranges                      | -18<=h<=16, -22<=k<=22, -24<=l<=24                                              |
| Reflections collected             | 30301                                                                           |
| Independent reflections           | 10458 [R(int) = 0.0482]                                                         |
| Completeness to theta = 25.242°   | 99.7 %                                                                          |
| Absorption correction             | Semi-empirical from equivalents                                                 |
| Max. and min. transmission        | 0.7457 and 0.6291                                                               |
| Refinement method                 | Full-matrix least-squares on F <sup>2</sup>                                     |
| Data / restraints / parameters    | 10458 / 0 / 625                                                                 |
| Goodness-of-fit on F <sup>2</sup> | 0.989                                                                           |
| Final R indices [I>2sigma(I)]     | R1 = 0.0408, wR2 = 0.0875                                                       |
| R indices (all data)              | R1 = 0.0872, wR2 = 0.1040                                                       |
| Largest diff. peak and hole       | 0.457 and -0.361 e.Å <sup>-3</sup>                                              |

|                     |                     |
|---------------------|---------------------|
| Identification code | <b>6</b>            |
| Empirical formula   | C34 H29 N10 O2 S4 Y |
| Formula weight      | 826.82              |
| Temperature         | 296(2) K            |

|                                   |                                             |                              |
|-----------------------------------|---------------------------------------------|------------------------------|
| Wavelength                        | 0.71073 Å                                   |                              |
| Crystal system                    | Monoclinic                                  |                              |
| Space group                       | P 21/n                                      |                              |
| Unit cell dimensions              | a = 9.362(10) Å                             |                              |
|                                   | b = 21.55(2) Å                              | $\beta = 98.64(2)^\circ$ .   |
|                                   | c = 19.379(16) Å                            |                              |
| Volume                            | 3865(6) Å <sup>3</sup>                      |                              |
| Z                                 | 4                                           |                              |
| Density (calculated)              | 1.421 Mg/m <sup>3</sup>                     |                              |
| Absorption coefficient            | 1.769 mm <sup>-1</sup>                      |                              |
| F(000)                            | 1688                                        |                              |
| Crystal size                      | 0.25 x 0.15 x 0.01 mm <sup>3</sup>          |                              |
| Theta range for data collection   | 2.584 to 22.496°.                           |                              |
| Index ranges                      | -8<=h<=10, -23<=k<=23, -20<=l<=18           |                              |
| Reflections collected             | 17204                                       |                              |
| Independent reflections           | 5034 [R(int) = 0.1299]                      |                              |
| Completeness to theta = 22.496°   | 99.7 %                                      |                              |
| Absorption correction             | Semi-empirical from equivalents             |                              |
| Max. and min. transmission        | 0.7454 and 0.3494                           |                              |
| Refinement method                 | Full-matrix least-squares on F <sup>2</sup> |                              |
| Data / restraints / parameters    | 5034 / 30 / 455                             |                              |
| Goodness-of-fit on F <sup>2</sup> | 1.517                                       |                              |
| Final R indices [I>2sigma(I)]     | R1 = 0.1286, wR2 = 0.2860                   |                              |
| R indices (all data)              | R1 = 0.1759, wR2 = 0.3007                   |                              |
| Largest diff. peak and hole       | 1.005 and -1.981 e.Å <sup>-3</sup>          |                              |
| <hr/>                             |                                             |                              |
| Identification code               | <b>7</b>                                    |                              |
| Empirical formula                 | C47 H44 N15 O4 S7 Y                         |                              |
| Formula weight                    | 1196.30                                     |                              |
| Temperature                       | 293(2) K                                    |                              |
| Wavelength                        | 0.71073 Å                                   |                              |
| Crystal system                    | Monoclinic                                  |                              |
| Space group                       | P n                                         |                              |
| Unit cell dimensions              | a = 10.922(5) Å                             |                              |
|                                   | b = 17.836(11) Å                            | $\beta = 98.157(18)^\circ$ . |
|                                   | c = 28.622(18) Å                            |                              |
| Volume                            | 5519(5) Å <sup>3</sup>                      |                              |
| Z                                 | 4                                           |                              |
| Density (calculated)              | 1.440 Mg/m <sup>3</sup>                     |                              |
| Absorption coefficient            | 1.378 mm <sup>-1</sup>                      |                              |

|                                   |                                             |
|-----------------------------------|---------------------------------------------|
| F(000)                            | 2456                                        |
| Crystal size                      | 0.3 x 0.04 x 0.02 mm <sup>3</sup>           |
| Theta range for data collection   | 2.284 to 20.000°.                           |
| Index ranges                      | -7<=h<=10, -11<=k<=17, -26<=l<=27           |
| Reflections collected             | 8435                                        |
| Independent reflections           | 7133 [R(int) = 0.1319]                      |
| Completeness to theta = 20.000°   | 97.1 %                                      |
| Absorption correction             | Semi-empirical from equivalents             |
| Max. and min. transmission        | 0.6456 and 0.4639                           |
| Refinement method                 | Full-matrix least-squares on F <sup>2</sup> |
| Data / restraints / parameters    | 7133 / 1449 / 578                           |
| Goodness-of-fit on F <sup>2</sup> | 0.884                                       |
| Final R indices [I>2sigma(I)]     | R1 = 0.0889, wR2 = 0.1724                   |
| R indices (all data)              | R1 = 0.2513, wR2 = 0.2255                   |
| Absolute structure parameter      | 0.02(2)                                     |
| Largest diff. peak and hole       | 0.462 and -0.474 e.Å <sup>-3</sup>          |



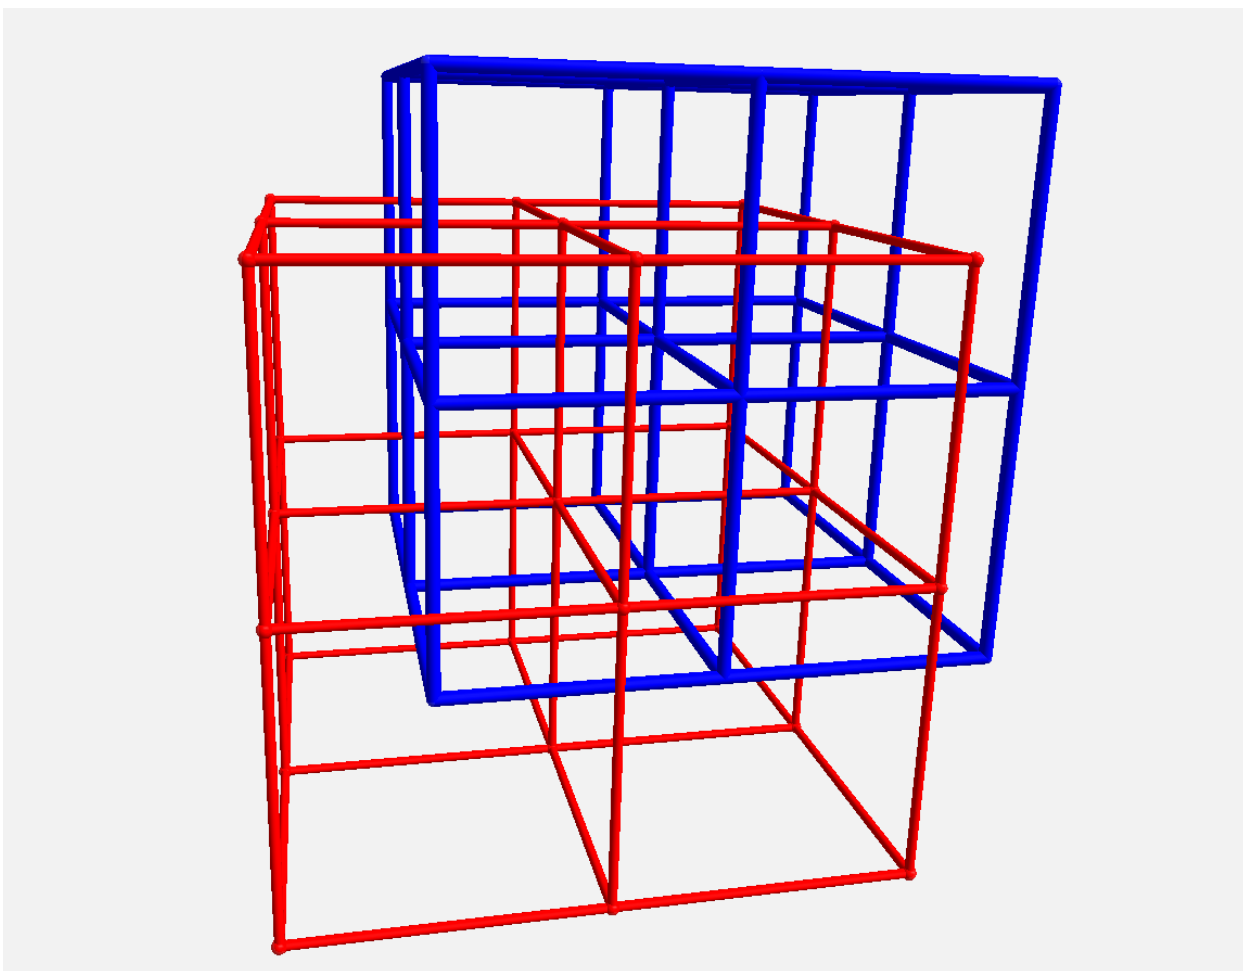

**Fig. S1.** Iinterpenetrating network.

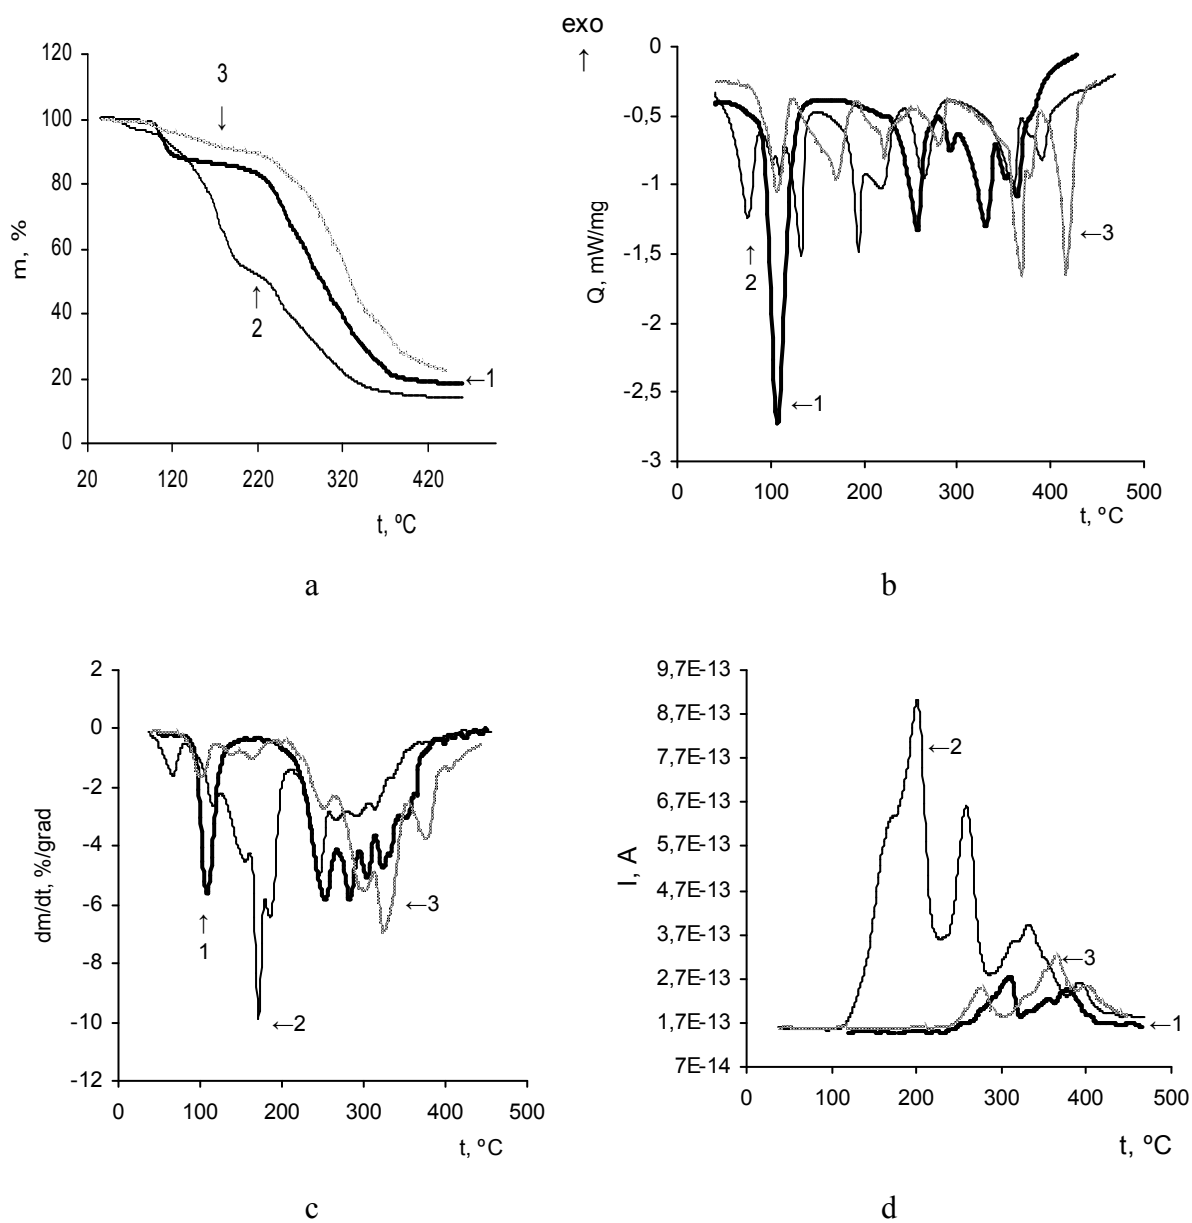

**Fig. S2.** TG (a), DSC (b), DTGA (c) curves and the temperature dependence of the ionic current in the mass spectra of the gases that evolved during thermogravimetry:  $m/z=156$  (d) for compounds: **1**, bold curves; **2**, thin curves; and **3**, dashed curves.
